# Supplementary material for: CD8+ T Cells from a Novel T Cell Receptor Transgenic Mouse Induce Liver-Stage Immunity That Can Be Boosted by Blood-Stage Infection in Rodent Malaria
Source: PubMed Central journal article supplement (PMC4031232; doi:10.1371/journal.ppat.1004135), 2014-05-22
Supplement: ppat.1004135.s005.pdf [file ppat.1004135.s005.pdf]

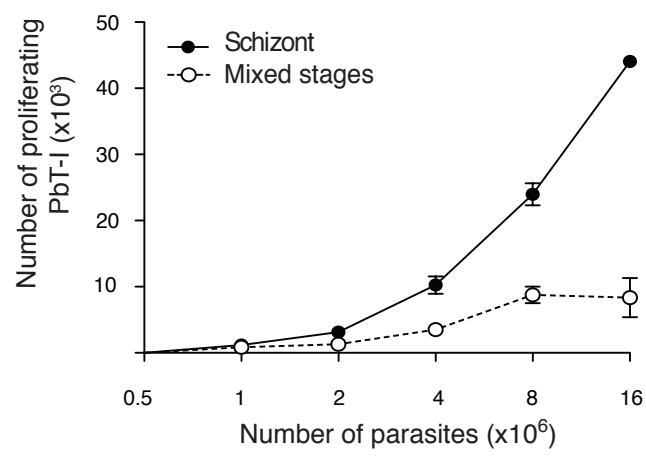

Suppl Figure 5
