# Supplementary material for: CD8+ T Cells from a Novel T Cell Receptor Transgenic Mouse Induce Liver-Stage Immunity That Can Be Boosted by Blood-Stage Infection in Rodent Malaria
Source: PubMed Central journal article supplement (PMC4031232; doi:10.1371/journal.ppat.1004135), 2014-05-22

**B6**

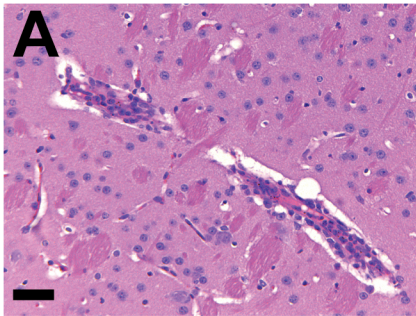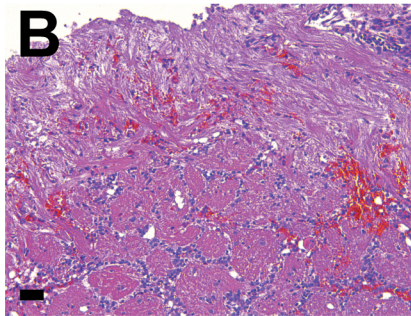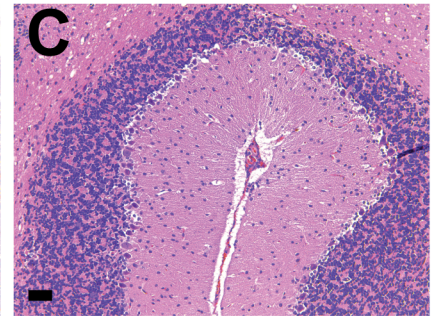

**B6, -CD8**

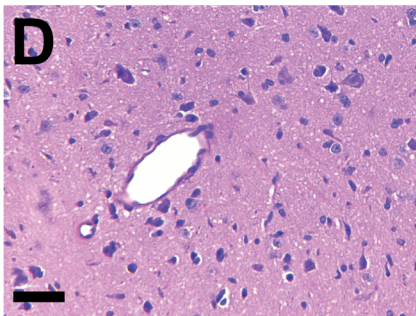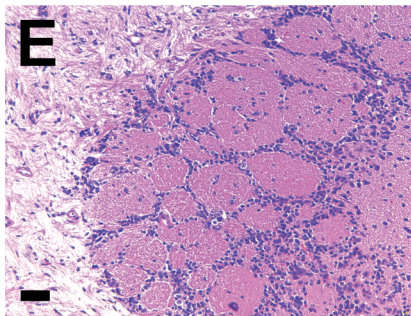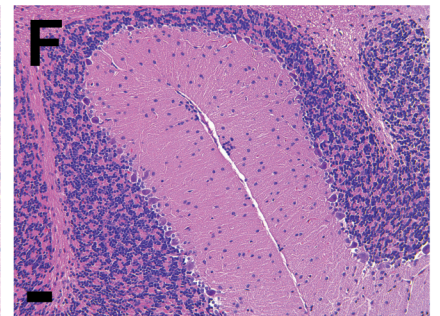

**B6, -CD8,  
+PbT-I**

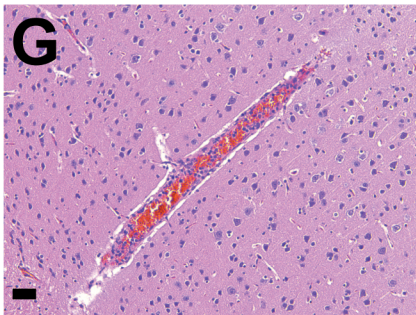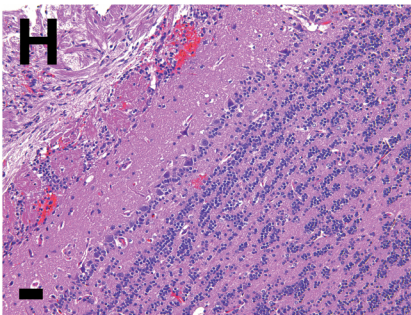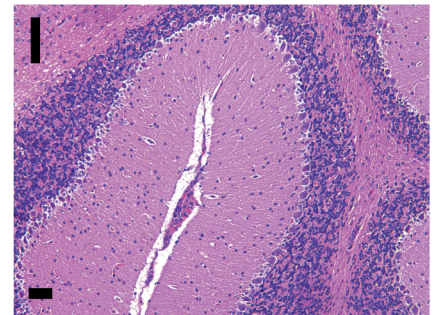

Supplement: ppat.1004135.s009.pdf [file ppat.1004135.s009.pdf]
