# Supplementary material for: CD8+ T Cells from a Novel T Cell Receptor Transgenic Mouse Induce Liver-Stage Immunity That Can Be Boosted by Blood-Stage Infection in Rodent Malaria
Source: PLOS journal article supplement (doi:10.1371/journal.ppat.1004135), 2014-05-22

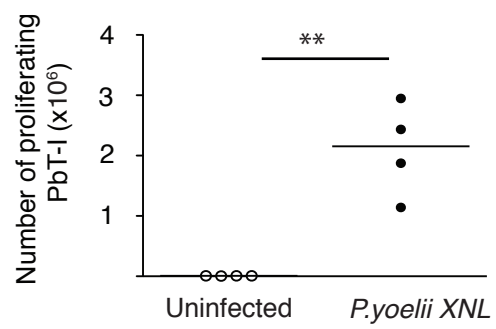

Supplement: S10 (10.1371/journal.ppat.1004135.s010) [file journal.ppat.1004135.s010]
